# Supplementary material for: Patterns of cannabis use during adolescence and their association with harmful substance use behaviour: findings from a UK birth cohort
Source: PubMed Central journal article supplement (PMC5537531; doi:10.1136/jech-2016-208503), 2017-06-07
Supplement: jech-2016-208503supp001.pdf [file jech-2016-208503supp001.pdf]

**Table S1: Recoding of cannabis-use questions at each time-point into variable on which latent class analysis was based**

| Age        | 13 years                                                                             | 14 years                                                                                                                                                                                                                       | 15 years                                                                                                                                                                                                                       | 16 years                                                                                                                                                                                                                       | 17 years                                                                                       | 18 years                                                                                                                                                  |
|------------|--------------------------------------------------------------------------------------|--------------------------------------------------------------------------------------------------------------------------------------------------------------------------------------------------------------------------------|--------------------------------------------------------------------------------------------------------------------------------------------------------------------------------------------------------------------------------|--------------------------------------------------------------------------------------------------------------------------------------------------------------------------------------------------------------------------------|------------------------------------------------------------------------------------------------|-----------------------------------------------------------------------------------------------------------------------------------------------------------|
| Source     | Computer in clinic                                                                   | Postal questionnaire                                                                                                                                                                                                           | Computer in clinic                                                                                                                                                                                                             | Postal questionnaire                                                                                                                                                                                                           | Computer in clinic                                                                             | Postal questionnaire                                                                                                                                      |
|            | “Have you ever tried cannabis?” = “No”                                               | “Have you ever tried cannabis?” = “No”                                                                                                                                                                                         | “Have you ever tried cannabis?” = “No”                                                                                                                                                                                         | “Have you ever tried cannabis?” = “No”                                                                                                                                                                                         | Ever tried cannabis? = “No”                                                                    | “Have you ever tried cannabis?” = “No”                                                                                                                    |
| Do not use |                                                                                      | Or, if “yes” to stem, “I have only ever tried cannabis once or twice” or “I used to sometimes use or take cannabis but I never do now”                                                                                         | Or, if “yes” to stem, “I have only ever tried cannabis once or twice” or “I used to sometimes use or take cannabis but I never do now”                                                                                         | Or, if “yes” to stem, “I have only ever tried cannabis once or twice” or “I used to sometimes use or take cannabis but I never do now”                                                                                         |                                                                                                |                                                                                                                                                           |
| Occasional | If “yes” to stem, “How many times in the last 6 months?” = “1-3 times” or “>4 times” | If “yes” to stem, “I sometimes use or take cannabis but less often than once a week”                                                                                                                                           | If “yes” to stem, “I sometimes take cannabis but less often than once a week”                                                                                                                                                  | If “yes” to stem, “I sometimes use or take cannabis but less often than once a week”                                                                                                                                           | If “yes” to stem, cannabis use in past 12 months = “Monthly or less” or “2-4 times per month”  | If “yes” to stem, “In the last 12 months, how often have you used cannabis?” = “Once or twice” or “Less than monthly” or “Monthly (but less than weekly)” |
| Frequent   | If “yes” to stem, “How many times in the last 6 months?” = “1 x per week”            | If “yes” to stem, “I usually use or take cannabis between one and six times a week” or “I usually use or take cannabis more than six times a week, but I don't use it every day” or “I usually use or take cannabis every day” | If “yes” to stem, “I usually use or take cannabis between one and six times a week” or “I usually use or take cannabis more than six times a week, but I don't use it every day” or “I usually use or take cannabis every day” | If “yes” to stem, “I usually use or take cannabis between one and six times a week” or “I usually use or take cannabis more than six times a week, but I don't use it every day” or “I usually use or take cannabis every day” | If “yes” to stem, cannabis use in past 12 months = “2-3 times per week” or “4+ times per week” | If “yes” to stem, “In the last 12 months, how often have you used cannabis?” = “Weekly” or “Daily or almost daily”                                        |

**Table S2: Model fit statistics for cannabis-use latent class models**

|                          | Number of classes (c)           |         |         |         |         |         |
|--------------------------|---------------------------------|---------|---------|---------|---------|---------|
|                          | 2                               | 3       | 4       | 5       | 6       | 7       |
|                          | <i>1+ measures (n=8,103)</i>    |         |         |         |         |         |
| SSA-BIC                  | 16445.9                         | 16230.2 | 16178.2 | 16230.2 | 16283.7 | 16353.8 |
| Conditional independence | 1896.3                          | 567.0   | 158.9   | 116.0   | 83.3    | 87.0    |
| Entropy                  | 0.766                           | 0.734   | 0.765   | 0.780   | 0.743   | 0.755   |
| LMR p-value              | < 0.001                         | < 0.001 | < 0.001 | < 0.001 | 1.000   | 0.563   |
| BLRT p-value             | < 0.001                         | < 0.001 | < 0.001 | 0.072   | 0.006   | 0.608   |
| Smallest class size      | 1168                            | 324     | 235     | 98      | 115     | 65      |
|                          | <i>3+ measures (n=5,315)</i>    |         |         |         |         |         |
| SSA-BIC                  | 13748.5                         | 13492.1 | 13402.7 | 13411.8 | 13425.1 | 13456.3 |
| Conditional independence | 1207.4                          | 331.1   | 92.0    | 65.5    | 34.2    | 33.6    |
| Entropy                  | 0.848                           | 0.809   | 0.833   | 0.843   | 0.806   | 0.815   |
| LMR p-value              | < 0.001                         | < 0.001 | < 0.001 | 0.051   | 0.283   | 0.718   |
| BLRT p-value             | < 0.001                         | < 0.001 | < 0.001 | 0.208   | 0.766   | 0.660   |
| Smallest class size      | 733                             | 184     | 121     | 51      | 60      | 36      |
|                          | <i>All 6 measures (n=1,481)</i> |         |         |         |         |         |
| SSA-BIC                  | 4535.8                          | 4449.9  | 4451.3  | 4493.5  | 4543.2  | 4600.3  |
| Conditional independence | 439.2                           | 139.3   | 32.3    | 22.2    | 18.2    | 11.4    |
| Entropy                  | 0.890                           | 0.887   | 0.905   | 0.904   | 0.906   | 0.928   |
| LMR p-value              | < 0.001                         | 0.222   | < 0.001 | 0.002   | 0.145   | 0.446   |
| BLRT p-value             | < 0.001                         | < 0.001 | < 0.001 | < 0.001 | 0.006   | 0.032   |
| Smallest class size      | 201                             | 31      | 17      | 5       | 6       | 7       |

*SSA-BIC - sample-size adjusted Bayesian Information Criterion.* The Bayesian Information Criterion (BIC) is the traditional fit statistic for comparing mixture models. BIC will typically decrease and then increase following the incremental additional of classes. Using this statistic the model with the lowest BIC (or other models with BIC values in that vicinity) would be deemed optimal. There is good support for 4-classes using the BIC. The 3-class model is deemed optimal for the complete case sample (n = 1,481) but this is to be expected given the smaller sample size.

*Conditional independence.* This is an assessment of the remaining association between each pair of measurements once heterogeneity accounted for by latent C has been removed. There is currently no accepted threshold for this measure however we tend to observe marked improvements (reductions) followed by smaller changes. Here these data suggests improvements up until 6 classes.

*Entropy.* This is a measure of classification accuracy, and whilst it is generally of little use in determining the optimal model, it indicates the level of bias which one would expect were a standard three-step estimation to be performed. Here entropy is fairly high and above the commonly-used threshold of 0.8 for all models. We have recently demonstrated (paper in press) that bias can result even for values reaching 0.9 and hence we have opted for the bias-adjusted three-step method as described in the methods.

*The Bootstrap Likelihood Ratio Test (BLRT) and the Lo-Mendell-Rubin (LMR) test statistics* both assess change in model fit when adding an additional class. Here a high p-value for a k-class model indicates no substantial improvement in fit compared to the k-1 class solution. Whilst the BLRT is usually more conservative, both are in support of a 4-class solution for the 3+ measurement sample.

*Other criteria.* The five-class solution was differentiated from the four-class solution by separation of regular users into early and late-onset and a substantial reduction in the size of the smallest class.

*Change in class distribution:* The class distribution across the latent classes using varying amounts of missing data was as followings for 1+, 3+ and 6 measures, respectively: Regular users: 4%, 3%, 2%; late onset occasion users: 14%, 14%, 15%; early-onset occasional users: 3%, 2%, 1%; non-users: 80%, 80%, 82%.

**Table S3. Unadjusted associations across increasingly restricted samples**

|                                    | Reference class        | Sample for unadjusted models<br>OR (95% CI) | Sample for adjusted models 1<br>OR (95% CI) | Sample for adjusted models 2<br>OR (95% CI) | Sample for adjusted models 3<br>OR (95% CI) | Sample for adjusted models 4<br>OR (95% CI) |
|------------------------------------|------------------------|---------------------------------------------|---------------------------------------------|---------------------------------------------|---------------------------------------------|---------------------------------------------|
| <i>Nicotine dependence</i>         |                        |                                             |                                             |                                             |                                             |                                             |
|                                    |                        | n=3,215                                     | n=2,772                                     | n=2,197                                     | n=2,134                                     | n=1,863                                     |
| Late onset occasional              | Non-user               | 4.43 [1.82, 10.8]                           | 3.29 [1.02, 10.6]                           | 2.44 [0.52, 11.4]                           | 2.51 [0.56, 11.3]                           | 2.87 [0.67, 12.3]                           |
| Early onset occasional             | Non-user               | 5.78 [1.02, 32.8]                           | 4.97 [0.50, 49.1]                           | 8.31 [1.21, 57.3]                           | 8.30 [1.27, 54.4]                           | 10.1 [1.65, 61.6]                           |
| Regular                            | Non-user               | 26.7 [12.3, 57.9]                           | 35.1 [14.9, 82.7]                           | 28.8 [10.0, 82.6]                           | 24.4 [8.06, 74.1]                           | 17.9 [4.82, 66.4]                           |
| Early onset occasional             | Late onset occasional  | 1.30 [0.20, 8.48]                           | 1.51 [0.12, 18.7]                           | 3.41 [0.31, 37.6]                           | 3.31 [0.32, 34.0]                           | 3.51 [0.39, 31.8]                           |
| Regular                            | Late onset occasional  | 6.03 [2.30, 15.8]                           | 10.7 [3.18, 35.8]                           | 11.8 [2.30, 60.6]                           | 9.75 [1.88, 50.5]                           | 6.24 [1.11, 35.2]                           |
| Regular                            | Early onset occasional | 4.62 [0.72, 29.7]                           | 7.07 [0.64, 78.6]                           | 3.46 [0.42, 28.7]                           | 2.94 [0.36, 24.0]                           | 1.78 [0.21, 15.2]                           |
| <i>Harmful alcohol consumption</i> |                        |                                             |                                             |                                             |                                             |                                             |
|                                    |                        | n=3,046                                     | n=2,631                                     | n=2,093                                     | n=2,034                                     | n=1,772                                     |
| Late onset occasional              | Non-user               | 4.26 [2.96, 6.13]                           | 4.10 [2.79, 6.03]                           | 3.49 [2.24, 5.42]                           | 3.56 [2.27, 5.58]                           | 3.29 [2.03, 5.32]                           |
| Early onset occasional             | Non-user               | 8.18 [3.99, 16.8]                           | 8.46 [3.91, 18.4]                           | 8.35 [3.57, 19.5]                           | 8.53 [3.67, 19.9]                           | 7.16 [2.86, 17.9]                           |
| Regular                            | Non-user               | 3.45 [1.78, 6.69]                           | 3.07 [1.45, 6.52]                           | 3.51 [1.52, 8.12]                           | 3.90 [1.68, 9.08]                           | 4.27 [1.69, 10.8]                           |
| Early onset occasional             | Late onset occasional  | 1.92 [0.87, 4.24]                           | 2.06 [0.88, 4.83]                           | 2.40 [0.93, 6.16]                           | 2.40 [0.93, 6.15]                           | 2.18 [0.78, 6.07]                           |
| Regular                            | Late onset occasional  | 0.81 [0.39, 1.70]                           | 0.75 [0.33, 1.72]                           | 1.01 [0.40, 2.57]                           | 1.10 [0.43, 2.81]                           | 1.30 [0.46, 3.66]                           |
| Regular                            | Early onset occasional | 0.42 [0.16, 1.15]                           | 0.36 [0.12, 1.10]                           | 0.42 [0.12, 1.43]                           | 0.46 [0.13, 1.56]                           | 0.60 [0.16, 2.29]                           |
| <i>Other illicit drug use</i>      |                        |                                             |                                             |                                             |                                             |                                             |
|                                    |                        | n=3,048                                     | n=2,631                                     | n=2,094                                     | n=2,033                                     | n=1,772                                     |
| Late onset occasional              | Non-user               | 13.1 [8.79, 19.4]                           | 14.3 [9.35, 21.9]                           | 12.7 [7.95, 20.2]                           | 13.4 [8.30, 21.5]                           | 10.8 [6.50, 17.8]                           |
| Early onset occasional             | Non-user               | 8.26 [3.75, 18.2]                           | 7.49 [3.11, 18.0]                           | 5.25 [1.86, 14.9]                           | 5.38 [1.92, 15.1]                           | 6.27 [2.30, 17.1]                           |
| Regular                            | Non-user               | 27.0 [14.2, 51.5]                           | 31.2 [14.8, 65.6]                           | 36.4 [14.2, 93.2]                           | 38.7 [14.4, 104]                            | 40.4 [12.4, 131]                            |
| Early onset occasional             | Late onset occasional  | 0.63 [0.27, 1.48]                           | 0.52 [0.21, 1.33]                           | 0.41 [0.14, 1.24]                           | 0.40 [0.14, 1.20]                           | 0.58 [0.20, 1.71]                           |
| Regular                            | Late onset occasional  | 2.07 [1.02, 4.21]                           | 2.18 [0.97, 4.90]                           | 2.87 [1.04, 7.88]                           | 2.90 [1.01, 8.33]                           | 3.75 [1.07, 13.2]                           |
| Regular                            | Early onset occasional | 3.27 [1.17, 9.14]                           | 4.17 [1.31, 13.3]                           | 6.92 [1.67, 28.7]                           | 7.20 [1.69, 30.6]                           | 6.43 [1.34, 31.0]                           |

Reference categories for outcomes are: nicotine dependence 'non-smoker/low/very low dependence'; alcohol consumption 'low risk/hazardous'; other illicit drug use 'never used/not used in last 3mn'

model 1: sample restricted to those with sex; household income, housing tenure; crowding status; birth order; maternal educational attainment,

model 2: sample additionally restricted to those with maternal substance use information (smoking, alcohol consumption and cannabis-use);

model 3: sample additionally restricted to those with data on child conduct problems at age 11 years

model 4: sample additionally restricted to those with data on tobacco and alcohol use at age 13 years.

All p-values < 0.001

**Table S4. Social patterning of the three 21-year outcomes**

|                                   | Nicotine dependence |                             | Harmful alcohol consumption |                              | Other illicit drug use |                              |
|-----------------------------------|---------------------|-----------------------------|-----------------------------|------------------------------|------------------------|------------------------------|
|                                   | % with outcome      | OR [95% CI]                 | % with outcome              | OR [95% CI]                  | % with outcome         | OR [95% CI]                  |
| <i>Sex</i>                        |                     |                             |                             |                              |                        |                              |
| Male                              | 1.9%                | 1.00 ref.                   | 15.8%                       | 1.00 ref.                    | 30.9%                  | 1.00 ref.                    |
| Female                            | 2.1%                | 1.13 [0.68, 1.89]<br>p=0.64 | 10.2 %                      | 0.60 [0.49, 0.75]<br>p<0.001 | 22.5%                  | 0.65 [0.55, 0.77]<br>p<0.001 |
| <i>Housing tenure</i>             |                     |                             |                             |                              |                        |                              |
| Mortgaged/owned home              | 1.8%                | 1.00 ref.                   | 12.7%                       | 1.00 ref.                    | 25.7%                  | 1.00 ref.                    |
| Rented                            | 3.4%                | 1.95 [0.91, 4.16]           | 12.6%                       | 0.98 [0.65, 1.49]            | 27.6%                  | 1.10 [0.81, 1.50]            |
| Subsidized rented                 | 2.4%                | 1.35 [0.48, 3.78]<br>p=0.20 | 9.7%                        | 0.73 [0.43, 1.27]<br>p=0.54  | 25.3%                  | 0.98 [0.67, 1.42]<br>p=0.82  |
| <i>Sibling order</i>              |                     |                             |                             |                              |                        |                              |
| First child                       | 1.9%                | 1.00 ref.                   | 12.8%                       | 1.00 ref.                    | 24.1%                  | 1.00 ref.                    |
| Second child                      | 1.6%                | 0.81 [0.45, 1.48]           | 12.9%                       | 1.01 [0.80, 1.28]            | 27.0%                  | 1.16 [0.97, 1.40]            |
| Third child or higher             | 2.8%                | 1.49 [0.78, 2.83]<br>p=0.24 | 10.6%                       | 0.81 [0.58, 1.13]<br>p=0.42  | 28.2%                  | 1.24 [0.98, 1.57]<br>p=0.11  |
| <i>Home over-crowding</i>         |                     |                             |                             |                              |                        |                              |
| ≤ 1 person / room                 | 1.9%                | 1.00 ref.                   | 12.7%                       | 1.00 ref.                    | 25.8%                  | 1.00 ref.                    |
| > 1 person / room                 | 3.6%                | 1.92 [0.59, 6.26]<br>p=0.27 | 7.9%                        | 0.59 [0.25, 1.37]<br>p=0.21  | 22.4%                  | 0.83 [0.48, 1.43]<br>p=0.50  |
| <i>Maternal education</i>         |                     |                             |                             |                              |                        |                              |
| Qualifications beyond high school | 1.6%                | 1.00 ref.                   | 14.4%                       | 1.00 ref.                    | 30.1%                  | 1.00 ref.                    |
| High school qualifications        | 1.8%                | 1.12 [0.62, 2.03]           | 11.4%                       | 0.77 [0.60, 0.98]            | 21.9%                  | 0.65 [0.54, 0.79]            |
| No high school qualifications     | 3.5%                | 2.16 [1.17, 3.97]<br>p=0.03 | 8.6%                        | 0.56 [0.40, 0.80]<br>p=0.002 | 20.3%                  | 0.59 [0.46, 0.76]<br>p<0.001 |
| <i>Household income</i>           |                     |                             |                             |                              |                        |                              |
| High (top quintile)               | 1.4%                | 1.00 ref.                   | 15.3%                       | 1.00 ref.                    | 29.8%                  | 1.00 ref.                    |
| Middle high                       | 1.3%                | 0.90 [0.37, 2.20]           | 12.7%                       | 0.80 [0.59, 1.09]            | 27.5%                  | 0.89 [0.71, 1.13]            |
| Middle                            | 2.0%                | 1.45 [0.64, 3.31]           | 12.0%                       | 0.75 [0.54, 1.04]            | 23.4%                  | 0.72 [0.56, 0.92]            |
| Middle low                        | 1.8%                | 1.27 [0.52, 3.09]           | 10.1%                       | 0.62 [0.43, 0.89]            | 21.6%                  | 0.65 [0.49, 0.85]            |
| Low (bottom quintile)             | 3.2%                | 2.31 [0.99, 5.38]<br>p=0.21 | 9.5%                        | 0.58 [0.38, 0.89]<br>p=0.03  | 21.5%                  | 0.65 [0.47, 0.88]<br>p=0.002 |

Reference categories for outcomes: nicotine dependence 'non-smoker/low/very low dependence'; alcohol consumption 'low risk/hazardous'; other illicit drug use 'never used/not used in last 3 months'

**Table S5. Early tobacco / alcohol use and risk of 21-year outcomes**

|                                             | Nicotine dependence |                                | Harmful alcohol consumption |                                | Other illicit drug use |                                |
|---------------------------------------------|---------------------|--------------------------------|-----------------------------|--------------------------------|------------------------|--------------------------------|
|                                             | % with outcome      | OR [95% CI]                    | % with outcome              | OR [95% CI]                    | % with outcome         | OR [95% CI]                    |
| <i>Self-report smoking at 12yr 10mn</i>     |                     |                                |                             |                                |                        |                                |
| No                                          | 2.0%                | 1.00 ref.                      | 11.9%                       | 1.00 ref.                      | 11.4%                  | 1.00 ref.                      |
| Yes                                         | 7.7%                | 4.16 [2.37, 7.28]<br>p < 0.001 | 22.9%                       | 2.20 [1.56, 3.09]<br>p < 0.001 | 24.3%                  | 2.49 [1.73, 3.59]<br>p < 0.001 |
| <i>Self-report alcohol use at 12yr 10mn</i> |                     |                                |                             |                                |                        |                                |
| None                                        | 1.9%                | 1.00 ref.                      | 11.2%                       | 1.00 ref.                      | 10.0%                  | 1.00 ref.                      |
| Less than weekly                            | 2.6%                | 1.43 [0.67, 3.07]              | 17.8%                       | 1.71 [1.23, 2.37]              | 19.2%                  | 2.25 [1.61, 3.15]              |
| Weekly +                                    | 9.3%                | 5.41 [3.16, 9.25]<br>p < 0.001 | 19.6%                       | 1.93 [1.35, 2.78]<br>p < 0.001 | 24.0%                  | 2.86 [1.97, 4.15]<br>p < 0.001 |

Reference categories for outcomes: nicotine dependence 'non-smoker/low/very low dependence'; alcohol consumption 'low risk/hazardous'; other illicit drug use 'never used/not used in last 3 months'
